# Supplementary material for: Young-Onset Gastrointestinal Adenocarcinoma Incidence and Survival Trends in the Northern Territory, Australia, with Emphasis on Indigenous Peoples
Source: MDPI journal article supplement (doi:10.3390/cancers14122870), 2022-06-10
Supplement: s1 [file s1]

**Table S1.** Average annual percentage change, AAPC, (Poisson Regression Model) for gender, indigenous status and primary sites of cancer between two age groups ( $n=1,308$ ).

|                   | (18-50 Years)        |                 | (>50 Years)         |                 |
|-------------------|----------------------|-----------------|---------------------|-----------------|
|                   | $n=298$              |                 | $n=1310$            |                 |
|                   | AAPC (95% CI)        | <i>p</i> -Value | AAPC (95% CI)       | <i>p</i> -Value |
| Sex               |                      |                 |                     |                 |
| Male              | 2.23 (0.32, 4.18)    | 0.02            | 0.26 (-0.64, 1.16)  | 0.6             |
| Female            | 2.07 (-0.17, 4.36)   | 0.07            | -0.28 (-1.46, 0.92) | 0.6             |
| Indigenous status |                      |                 |                     |                 |
| Non-indigenous    | 1.88 (0.28, 3.51)    | 0.02            | -0.18 (-0.94, 0.58) | 0.6             |
| Indigenous        | 3.70 (0.24, 7.28)    | 0.04            | 1.63 (-0.66, 3.97)  | 0.2             |
| Cancer site       |                      |                 |                     |                 |
| Large intestine   | 1.62 (-0.43, 3.71)   | 0.1             | 0.50 (-0.49, 1.50)  | 0.3             |
| Rectum            | 2.60 (0.04, 5.23)    | 0.047           | -1.01 (-2.53, 0.53) | 0.2             |
| Pancreas          | 5.70 (-0.86, 12.69)  | 0.09            | 0.41 (-1.94, 2.82)  | 0.7             |
| Stomach           | -1.77 (-7.09, 3.85)  | 0.5             | -1.96 (-4.33, 0.46) | 0.1             |
| Oesophagus        | 3.66 (-3.65, 11.52)  | 0.3             | 0.65 (-2.27, 3.66)  | 0.7             |
| Small intestine   | 10.83 (-2.11, 25.48) | 0.1             | 3.35 (-3.03, 10.15) | 0.3             |

**Table S2.** Incidence rate ratios (IRR) and 95% CI (Poisson regression model) for sex, indigenous status and era by primary sites between two age groups ( $n=1,608$ ).

|                   | (18-50 Years)     |                 | (>50 Years)       |                 |
|-------------------|-------------------|-----------------|-------------------|-----------------|
|                   | $n=298$           |                 | $n=1310$          |                 |
|                   | IRR (95% CI)      | <i>p</i> -Value | IRR (95% CI)      | <i>p</i> -Value |
| Large intestine   |                   |                 |                   |                 |
| Sex               |                   |                 |                   |                 |
| Male              | Reference         | -               | Reference         | -               |
| Female            | 1.03 (0.74, 1.42) | 0.87            | 0.86 (0.74, 1.00) | 0.06            |
| Indigenous status |                   |                 |                   |                 |
| Non-indigenous    | Reference         | -               | Reference         | -               |
| Indigenous        | 0.51 (0.32, 0.79) | 0.003           | 0.31 (0.23, 0.41) | <0.0001         |
| Era               |                   |                 |                   |                 |
| 1990-1999         | Reference         | -               | Reference         | -               |
| 2000-2009         | 0.80 (0.52, 1.23) | 0.32            | 1.07 (0.87, 1.32) | 0.52            |
| 2010-2017         | 0.95 (0.64, 1.43) | 0.82            | 0.72 (0.59, 0.89) | 0.002           |
| Rectum            |                   |                 |                   |                 |
| Sex               |                   |                 |                   |                 |
| Male              | Reference         | -               | Reference         | -               |
| Female            | 0.65 (0.43, 0.99) | 0.04            | 0.45 (0.35, 0.59) | <0.0001         |
| Indigenous status |                   |                 |                   |                 |
| Non-indigenous    | Reference         | -               | Reference         | -               |
| Indigenous        | 0.75 (0.46, 1.24) | 0.26            | 0.38 (0.25, 0.59) | <0.0001         |
| Era               |                   |                 |                   |                 |
| 1990-1999         | Reference         | -               | Reference         | -               |
| 2000-2009         | 1.32 (0.77, 2.26) | 0.31            | 0.87 (0.64, 1.18) | 0.38            |
| 2010-2017         | 1.24 (0.73, 2.11) | 0.43            | 0.52 (0.38, 0.71) | <0.0001         |
| Pancreas          |                   |                 |                   |                 |
| Sex               |                   |                 |                   |                 |
| Male              | Reference         | -               | Reference         | -               |
| Female            | 0.77 (0.29, 2.01) | 0.59            | 0.79 (0.55, 1.13) | 0.19            |
| Indigenous status |                   |                 |                   |                 |
| Non-indigenous    | Reference         | -               | Reference         | -               |
| Indigenous        | 1.22 (0.43, 3.49) | 0.71            | 1.20 (0.78, 1.84) | 0.41            |
| Era               |                   |                 |                   |                 |
| 1990-1999         | Reference         | -               | Reference         | -               |
| 2000-2009         | 1.28 (0.30, 5.41) | 0.74            | 0.60 (0.37, 0.99) | 0.04            |
| 2010-2017         | 2.02 (0.54, 7.53) | 0.29            | 0.67 (0.43, 1.04) | 0.08            |
| Stomach           |                   |                 |                   |                 |
| Sex               |                   |                 |                   |                 |
| Male              | Reference         | -               | Reference         | -               |

|                   | (18-50 Years)      |         | (>50 Years)       |         |
|-------------------|--------------------|---------|-------------------|---------|
|                   | n=298              |         | n=1310            |         |
|                   | IRR (95% CI)       | p-Value | IRR (95% CI)      | p-Value |
| Female            | 0.81 (0.33, 2.02)  | 0.65    | 0.47 (0.31, 0.71) | 0.0003  |
| Indigenous status |                    |         |                   |         |
| Non-indigenous    | Reference          | -       | Reference         | -       |
| Indigenous        | 0.78 (0.26, 2.37)  | 0.66    | 1.28 (0.82, 2.00) | 0.28    |
| Era               |                    |         |                   |         |
| 1990-1999         | Reference          | -       | Reference         | -       |
| 2000-2009         | 1.96 (0.62, 6.25)  | 0.25    | 0.64 (0.39, 1.02) | 0.06    |
| 2010-2017         | 0.63 (0.16, 2.56)  | 0.52    | 0.45 (0.28, 0.71) | 0.0008  |
| Oesophagus        |                    |         |                   |         |
| Sex               |                    |         |                   |         |
| Male              | Reference          | -       | Reference         | -       |
| Female            | 0.22 (0.05, 1.02)  | 0.05    | 0.18 (0.10, 0.34) | <0.0001 |
| Indigenous status |                    |         |                   |         |
| Non-indigenous    | Reference          | -       | Reference         | -       |
| Indigenous        | 0.95 (0.25, 3.55)  | 0.93    | 0.36 (0.16, 0.84) | 0.02    |
| Era               |                    |         |                   |         |
| 1990-1999         | Reference          | -       | Reference         | -       |
| 2000-2009         | 0.74 (0.15, 3.75)  | 0.72    | 1.25 (0.67, 2.33) | 0.48    |
| 2010-2017         | 1.31 (0.32, 5.33)  | 0.7     | 0.78 (0.42, 1.47) | 0.45    |
| Small intestine   |                    |         |                   |         |
| Sex               |                    |         |                   |         |
| Male              | Reference          | -       | Reference         | -       |
| Female            | 1.06 (0.21, 5.27)  | 0.94    | 0.82 (0.33, 2.06) | 0.68    |
| Indigenous status |                    |         |                   |         |
| Non-indigenous    | Reference          | -       | Reference         | -       |
| Indigenous        | 2.90 (0.58, 14.49) | 0.2     | 0.82 (0.24, 2.83) | 0.76    |
| Era               |                    |         |                   |         |
| 1990-1999         | Reference          | -       | Reference         | -       |
| 2000-2009         | 0.88 (0.05, 14.29) | 0.93    | 1.83 (0.38, 8.81) | 0.45    |
| 2010-2017         | 3.03 (0.34, 27.42) | 0.32    | 1.69 (0.37, 7.73) | 0.5     |

**Table S3.** Hazard ratios (HR) and 95% CI (Cox Proportional hazard model) for sex, indigenous status and era by primary sites between two age groups (n=1,608).

|                   | (18-50 Years)      |         | (>50 Years)       |         |
|-------------------|--------------------|---------|-------------------|---------|
|                   | n=298              |         | n=1310            |         |
|                   | HR (95% CI)        | p-Value | HR (95% CI)       | p-Value |
| Large intestine   |                    |         |                   |         |
| Sex               |                    |         |                   |         |
| Male              | Reference          | -       | Reference         | -       |
| Female            | 0.82 (0.47, 1.44)  | 0.5     | 0.83 (0.67, 1.02) | 0.08    |
| Indigenous status |                    |         |                   |         |
| Non-indigenous    | Reference          | -       | Reference         | -       |
| Indigenous        | 2.22 (1.06, 4.64)  | 0.03    | 1.72 (1.19, 2.48) | 0.004   |
| Era               |                    |         |                   |         |
| 1990-1999         | Reference          | -       | Reference         | -       |
| 2000-2009         | 0.73 (0.38, 1.44)  | 0.37    | 0.79 (0.61, 1.02) | 0.07    |
| 2010-2017         | 0.46 (0.22, 0.98)  | 0.04    | 0.60 (0.44, 0.81) | 0.0008  |
| Rectum            |                    |         |                   |         |
| Sex               |                    |         |                   |         |
| Male              | Reference          | -       | Reference         | -       |
| Female            | 0.53 (0.25, 1.16)  | 0.11    | 0.92 (0.63, 1.35) | 0.68    |
| Indigenous status |                    |         |                   |         |
| Non-indigenous    | Reference          | -       | Reference         | -       |
| Indigenous        | 2.55 (1.13, 5.74)  | 0.02    | 1.37 (0.75, 2.49) | 0.31    |
| Era               |                    |         |                   |         |
| 1990-1999         | Reference          | -       | Reference         | -       |
| 2000-2009         | 0.74 (0.33, 1.66)  | 0.47    | 0.78 (0.53, 1.14) | 0.2     |
| 2010-2017         | 0.47 (0.17, 1.29)  | 0.15    | 0.64 (0.39, 1.04) | 0.07    |
| Pancreas          |                    |         |                   |         |
| Sex               |                    |         |                   |         |
| Male              | Reference          | -       | Reference         | -       |
| Female            | 1.40 (0.11, 18.24) | 0.8     | 1.10 (0.75, 1.61) | 0.64    |

|                   | (18-50 Years)      |                 | (>50 Years)         |                 |
|-------------------|--------------------|-----------------|---------------------|-----------------|
|                   | <i>n</i> =298      |                 | <i>n</i> =1310      |                 |
|                   | HR (95% CI)        | <i>p</i> -Value | HR (95% CI)         | <i>p</i> -Value |
| Indigenous status |                    |                 |                     |                 |
| Non-indigenous    | Reference          | -               | Reference           | -               |
| Indigenous        | 0.25 (0.01, 8.64)  | 0.45            | 1.84 (1.17, 2.89)   | 0.008           |
| Era               |                    |                 |                     |                 |
| 1990-1999         | Reference          | -               | Reference           | -               |
| 2000-2009         | 0.59 (0.03, 13.03) | 0.74            | 0.89 (0.54, 1.48)   | 0.66            |
| 2010-2017         | 0.21 (0.02, 2.73)  | 0.23            | 0.75 (0.46, 1.21)   | 0.23            |
| Stomach           |                    |                 |                     |                 |
| Sex               |                    |                 |                     |                 |
| Male              | Reference          | -               | Reference           | -               |
| Female            | 1.29 (0.13, 12.57) | 0.83            | 0.95 (0.57, 1.60)   | 0.86            |
| Indigenous status |                    |                 |                     |                 |
| Non-indigenous    | Reference          | -               | Reference           | -               |
| Indigenous        | 6.30 (0.75, 53.27) | 0.09            | 1.08 (0.62, 1.88)   | 0.78            |
| Era               |                    |                 |                     |                 |
| 1990-1999         | Reference          | -               | Reference           | -               |
| 2000-2009         | 0.27 (0.03, 2.77)  | 0.27            | 1.19 (0.68, 2.07)   | 0.54            |
| 2010-2017         | 0.88 (0.16, 4.97)  | 0.88            | 0.77 (0.42, 1.40)   | 0.39            |
| Oesophagus        |                    |                 |                     |                 |
| Sex               |                    |                 |                     |                 |
| Male              | Reference          | -               | Reference           | -               |
| Female            | -*                 |                 | 0.59 (0.28, 1.23)   | 0.16            |
| Indigenous status |                    |                 |                     |                 |
| Non-indigenous    | Reference          | -               | Reference           | -               |
| Indigenous        | -*                 |                 | 3.85 (1.68, 8.82)   | 0.001           |
| Era               |                    |                 |                     |                 |
| 1990-1999         | Reference          | -               | Reference           | -               |
| 2000-2009         | -*                 |                 | 0.52 (0.27, 1.01)   | 0.05            |
| 2010-2017         | -*                 |                 | 0.41 (0.20, 0.84)   | 0.02            |
| Small intestine   |                    |                 |                     |                 |
| Sex               |                    |                 |                     |                 |
| Male              | Reference          | -               | Reference           | -               |
| Female            | -*                 |                 | 1.49 (0.18, 12.25)  | 0.71            |
| Indigenous status |                    |                 |                     |                 |
| Non-indigenous    | Reference          | -               | Reference           | -               |
| Indigenous        | -*                 |                 | 5.43 (0.17, 178.26) | 0.34            |
| Era               |                    |                 |                     |                 |
| 1990-1999         | Reference          | -               | Reference           | -               |
| 2000-2009         | -*                 |                 | 0.06 (0.00, 1.53)   | 0.09            |
| 2010-2017         | -*                 |                 | 0.11 (0.01, 0.83)   | 0.03            |

\*Reliable estimates of HR (95% CI) cannot be obtained due to small sample size.

Incidence rates between indigenous status and sex across age groups and cancer sites in Northern Territory, 1990-2017

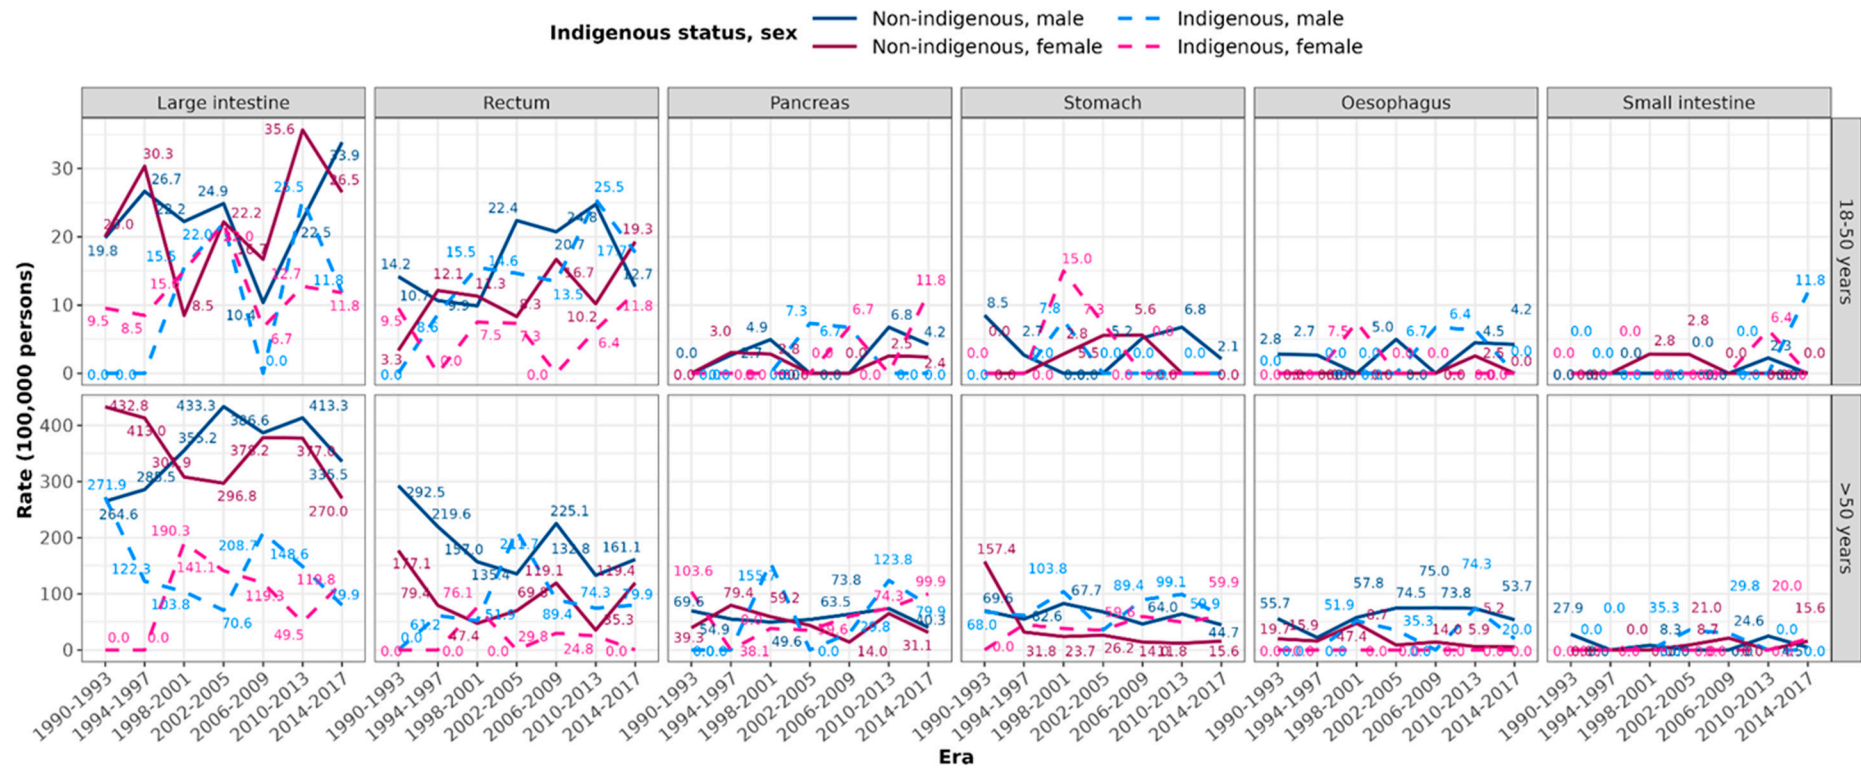

**Figure S1.** Trend in incidence rates by sex, indigenous status and era between two age groups across cancer sites 1990-2017 (N=1,608).

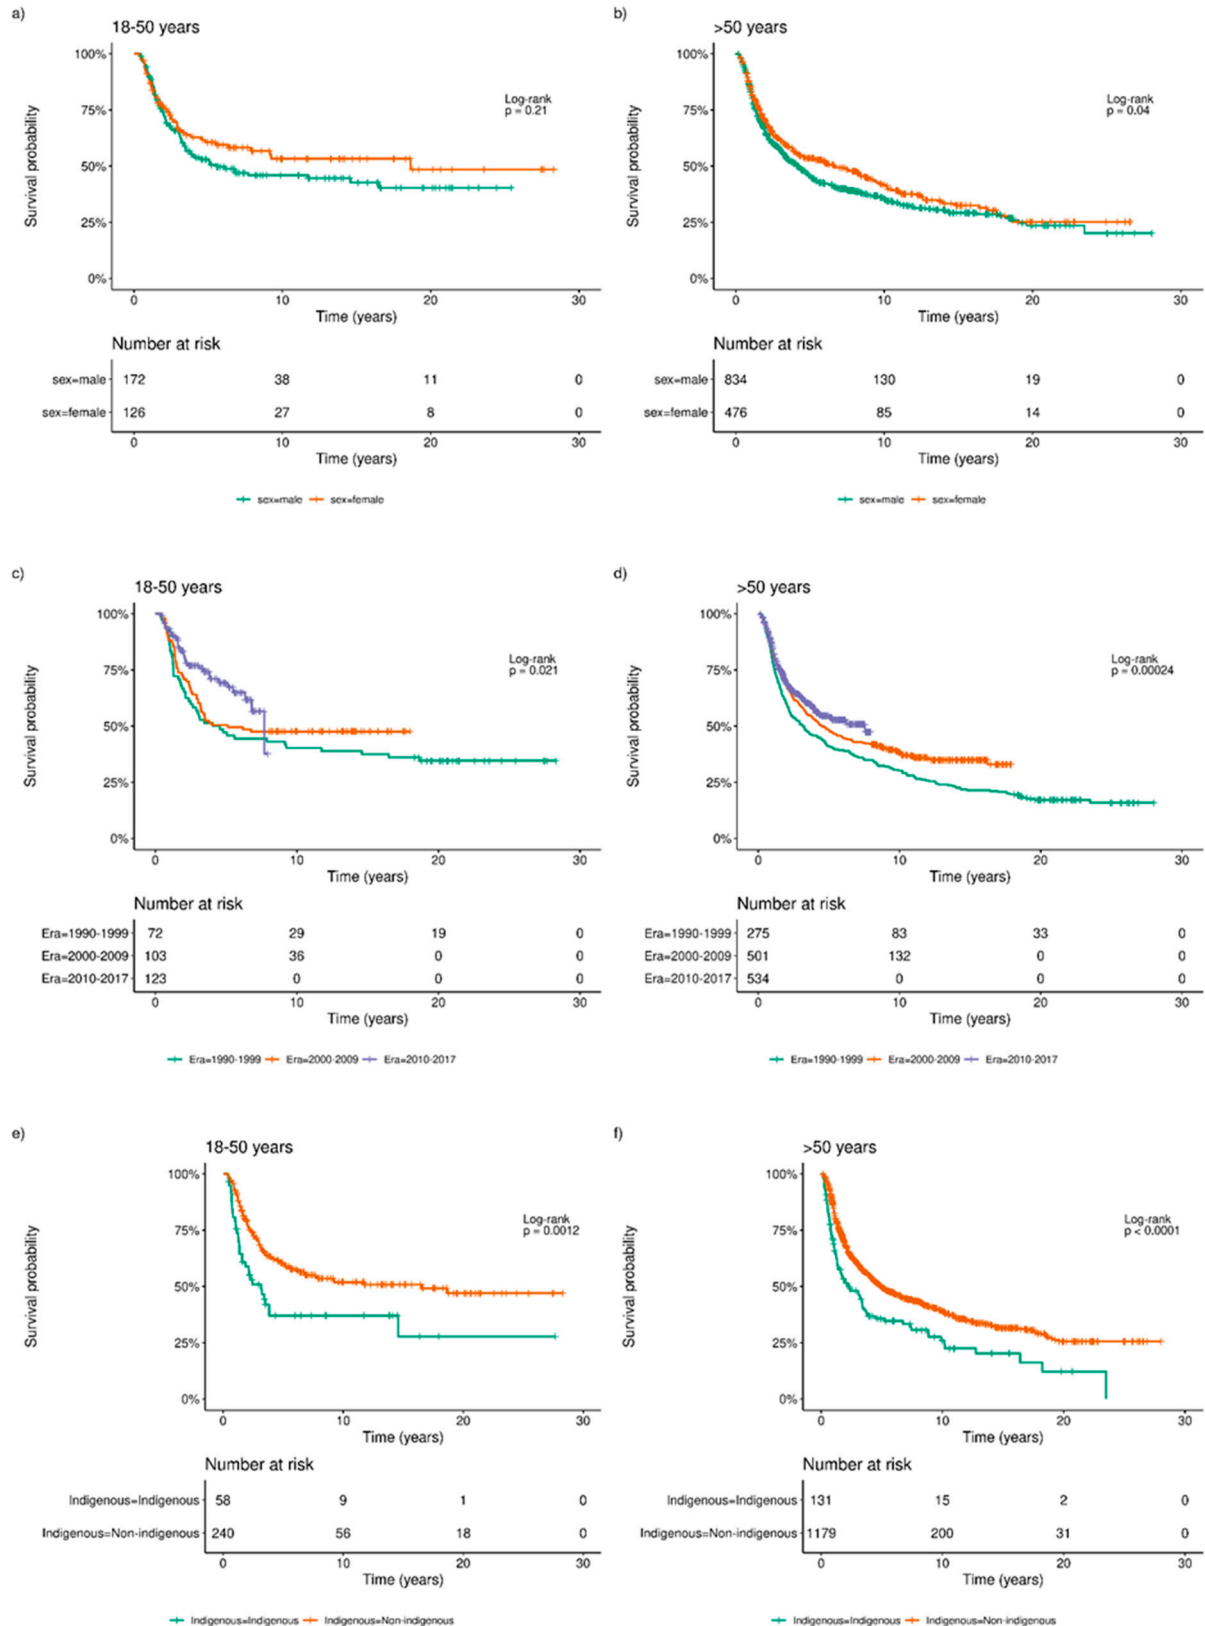

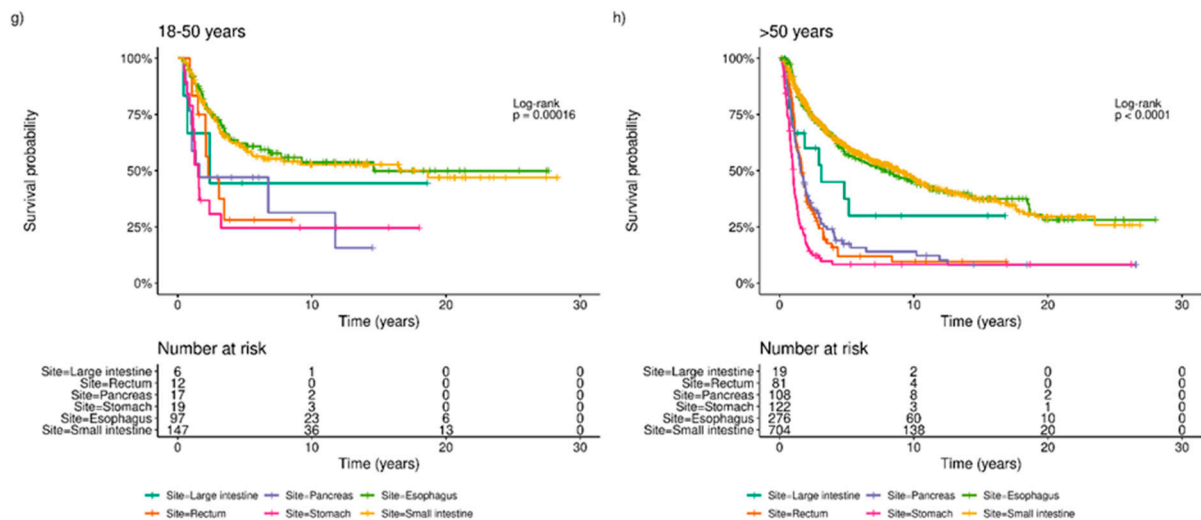

**Figure S2.** Kaplan-Meier survival curves for sex, era, indigenous status and primary sites between age groups.
